# Supplementary material for: Study of the alleviation effects of a combination of Lactobacillus rhamnosus and inulin on mice with colitis
Source: Royal Society of Chemistry journal article supplement (doi:10.1039/c9fo02992c), 2020-01-01
Supplement: c9fo02992c1.pdf [file c9fo02992c1.pdf]

Supplementary material

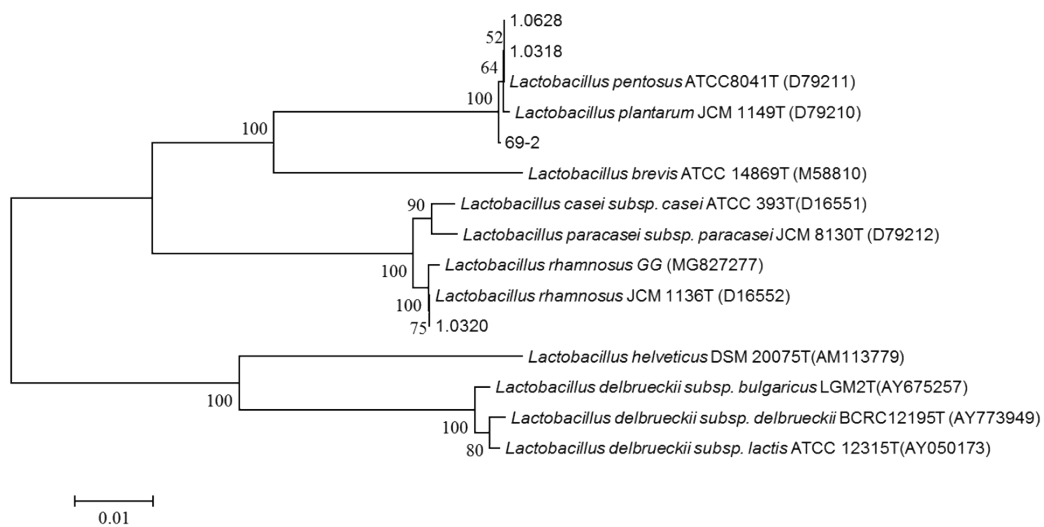

Fig. S1 Phylogenetic tree of *L. rhamnosus* 1.0320 and other strains based on 16S rRNA gene sequences.

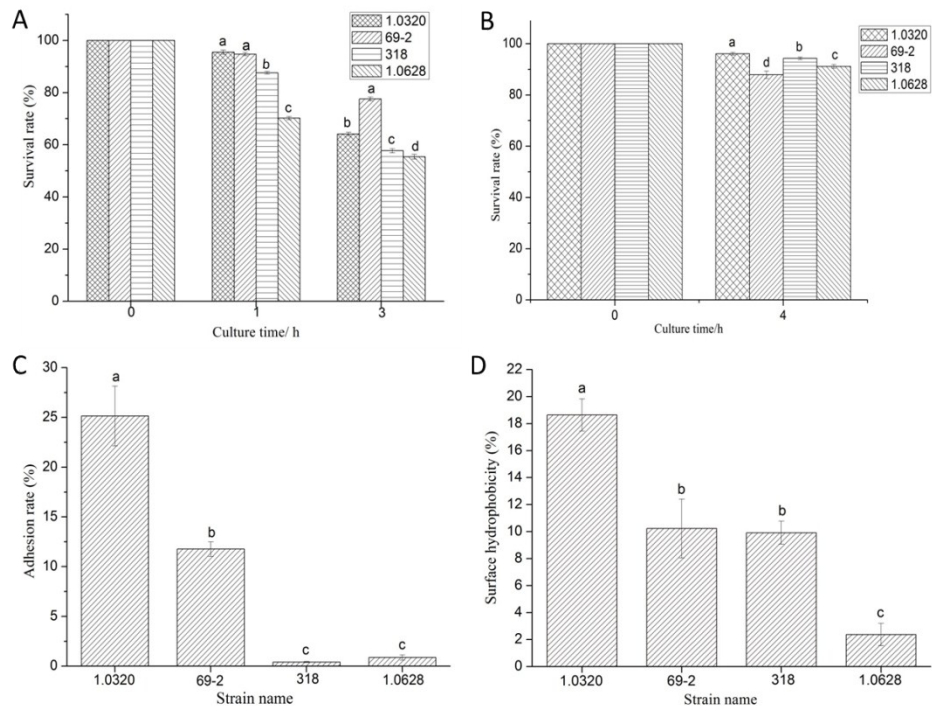

Fig. S2 Determination of probiotic characteristics of *L. rhamnosus* 1.0320. (A) Acid resistance of Lactobacillus strains to pH3; (B) Bile salt resistance of Lactobacillus strains to 0.3% bile salt; (C) Adhesion ability of Lactobacillus strains to Caco-2 cells; (D) Surface hydrophobicity ability of Lactobacillus strains. All data are expressed as mean  $\pm$  SD. Different letters indicate significant difference ( $P < 0.05$ ) among groups.

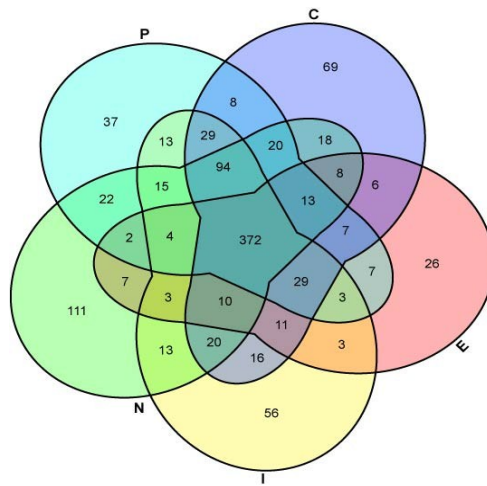

Note: N: Normal group, E: Enteritis group, A: Antibiotic group, P: Probiotics group, I: Inulin group, C: Combination group

Fig. S3 VEEN diagram representation of the number of OTUs. n = 5 per group.

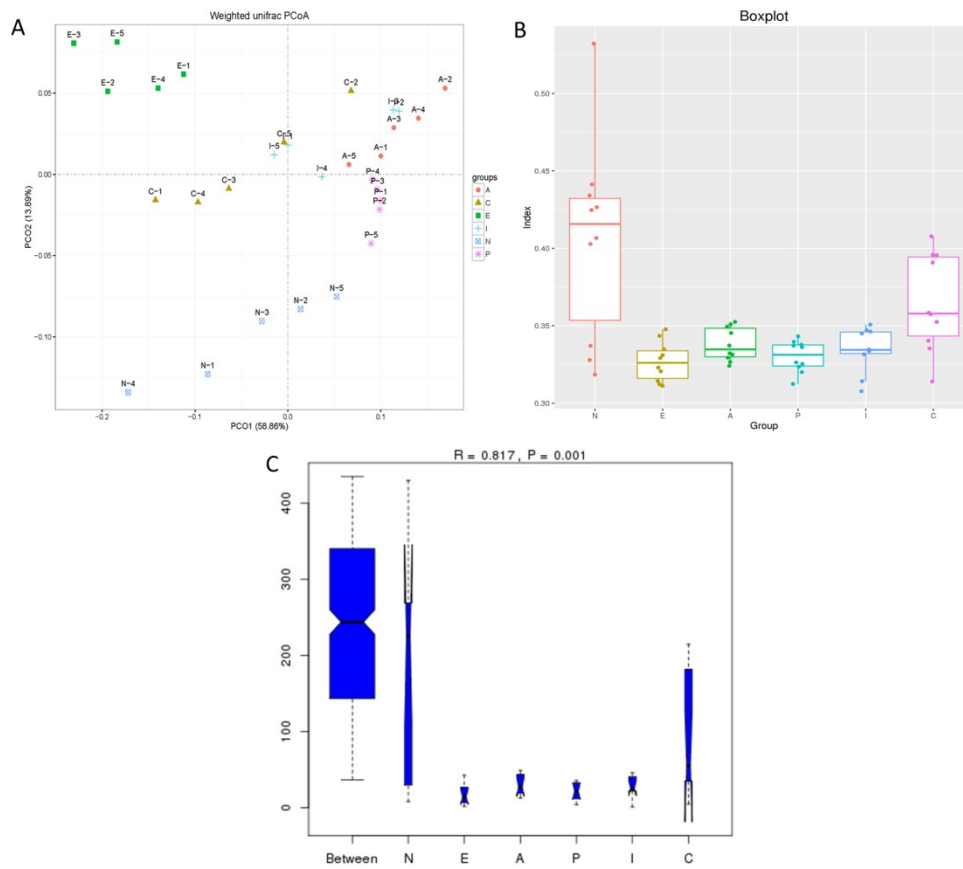

Note: N: Normal group, E: Enteritis group, A: Antibiotic group, P: Probiotics group, I: Inulin group, C: Combination group

Fig. S4 Influences of *L. rhamnosus* 1.0320 combined with inulin treatment on gut microbiota  $\beta$ -diversity. (A) PCoA analysis; (B) Unifrac distance matrix analysis; (C) ANOSIM analysis.  $n = 5$  per group.

### Cladogram

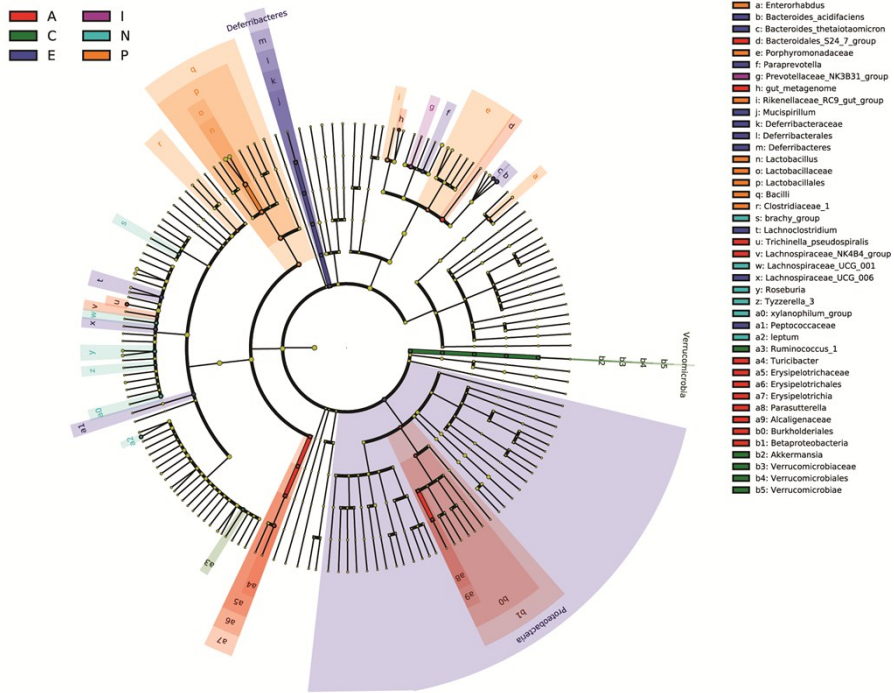

Note: N: Normal group, E: Enteritis group, A: Antibiotic group, P: Probiotics group, I: Inulin group, C: Combination group

Fig. S5 Lefse analysis of different samples. n = 5 per group.
